# Supplementary material for: Template-free synthesis of mesoporous spinel lithium titanate microspheres and their application in high-rate lithium ion batteries
Source: Royal Society of Chemistry journal article supplement (doi:10.1039/b907480e), 2009-01-01
Supplement: b907480e.pdf [file b907480e.pdf]

**Supporting Information for**

Template-free Synthesis of Mesoporous Spinel Lithium Titanate Microspheres and  
Their Application in High-rate Lithium Ion Batteries

Y.F. Tang, L. Yang\*, Z. Qiu, J.S. Huang

School of Chemistry and Chemical Technology, Shanghai Jiaotong University,  
Shanghai 200240, P.R. China

\*Corresponding author: Tel: 86 21 54748917, Fax: 86 21 54741297,

E-mail addresses: [liyance@sjtu.edu.cn](mailto:liyance@sjtu.edu.cn)

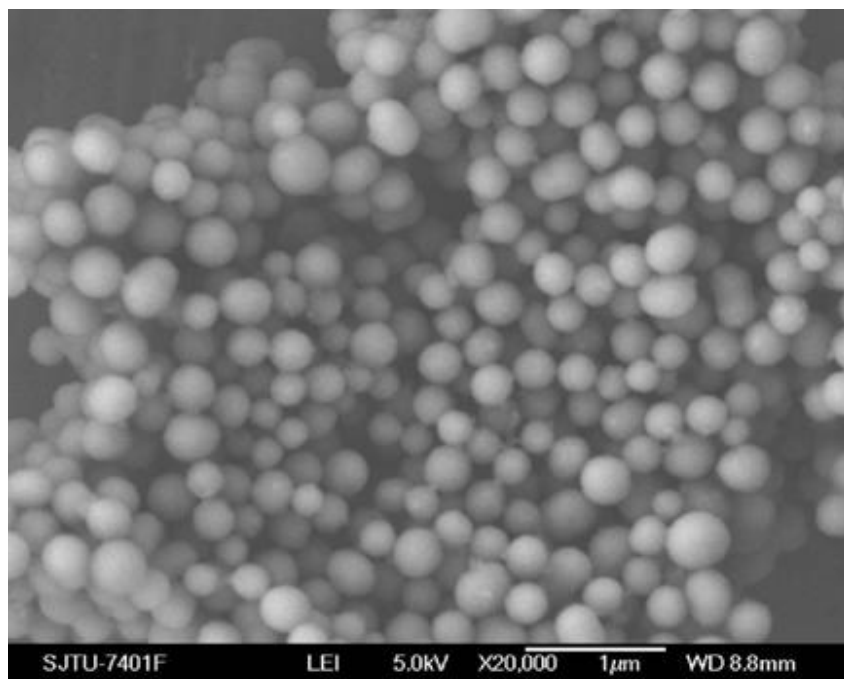

(a)

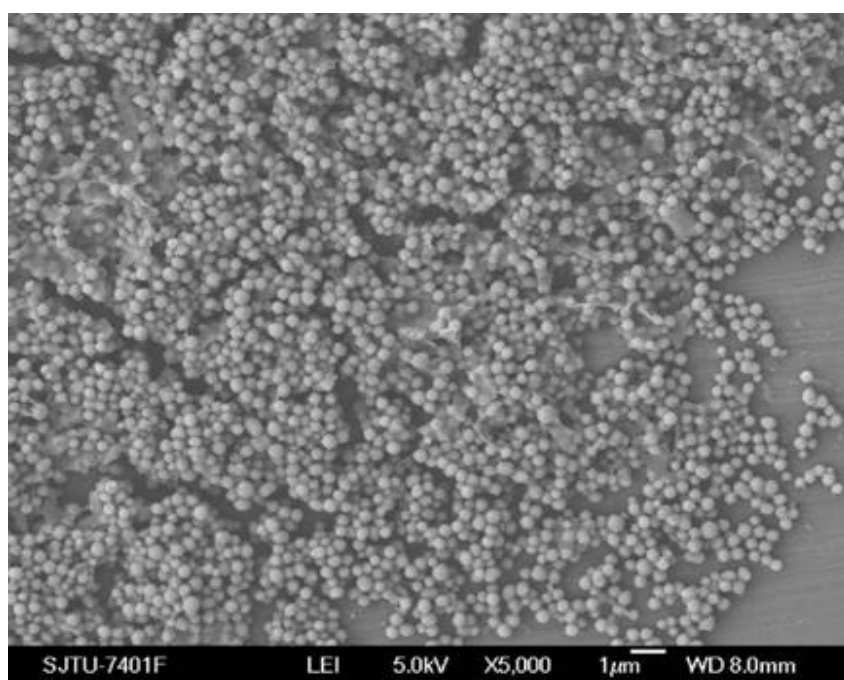

(b)

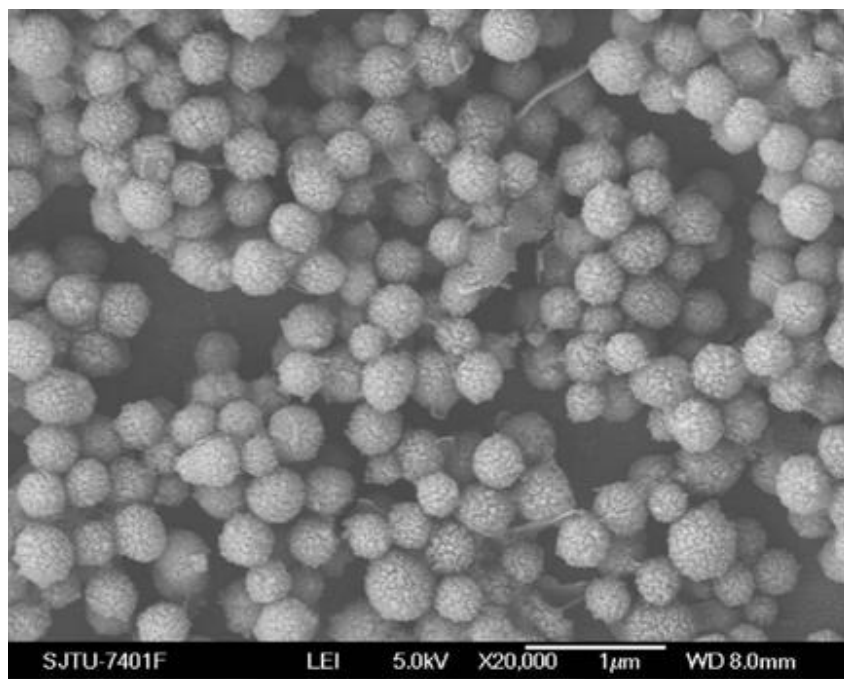

(c)

Figure S1. SEM image of amorphous hydrous titanium oxide (a), mesoporous  $\text{Li}_4\text{Ti}_5\text{O}_{12}$  spheres before annealing (b) and after annealing (c).

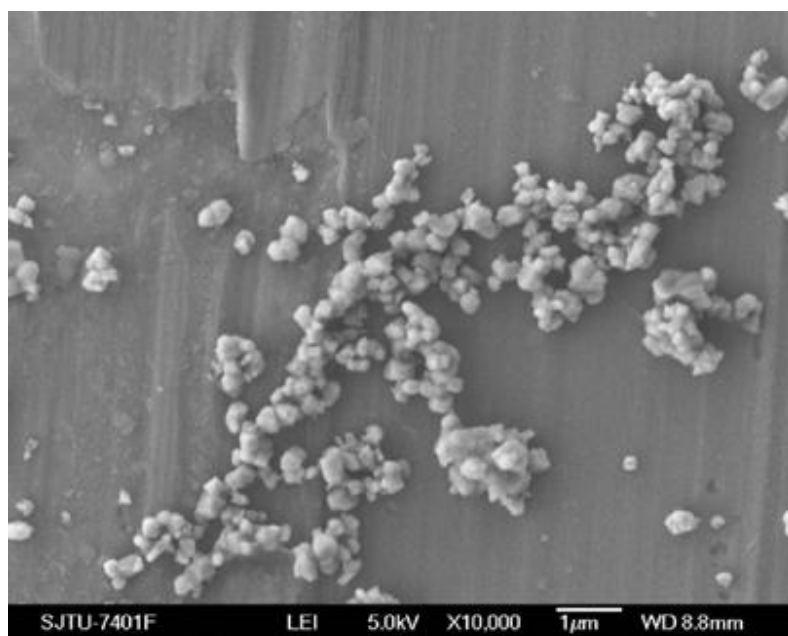

(a)

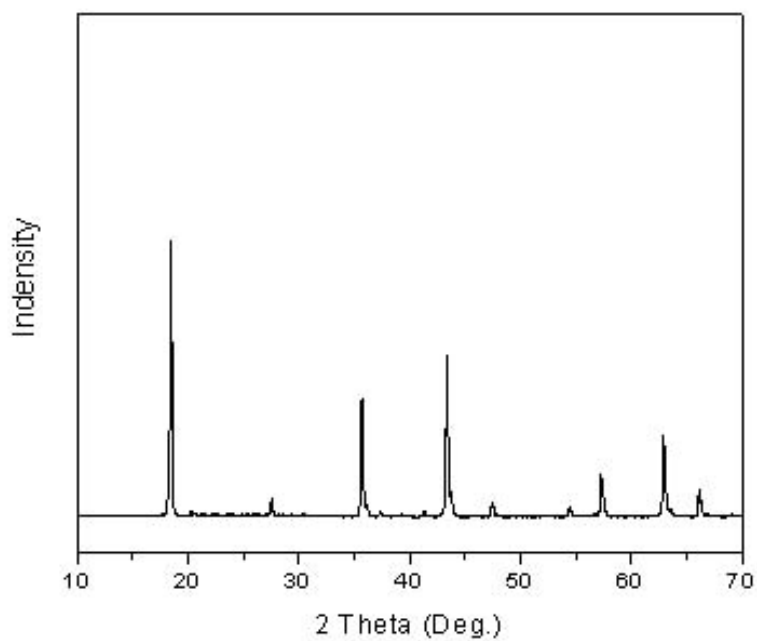

(b)

Figure S2. SEM image (a) and XRD pattern (b) of 200-LTO powder.

The 200-LTO and micro-LTO were both prepared by solid syntheses as reference<sup>28</sup>; only one difference is that P<sub>25</sub> was used as precursors for 200-LTO.
